# Supplementary material
Source: MDPI journal article supplement (https://www.mdpi.com/2072-4292/10/6/860)
Supplement: s1 [file s1]

**Figure S2:** The influence of climate change to NPP

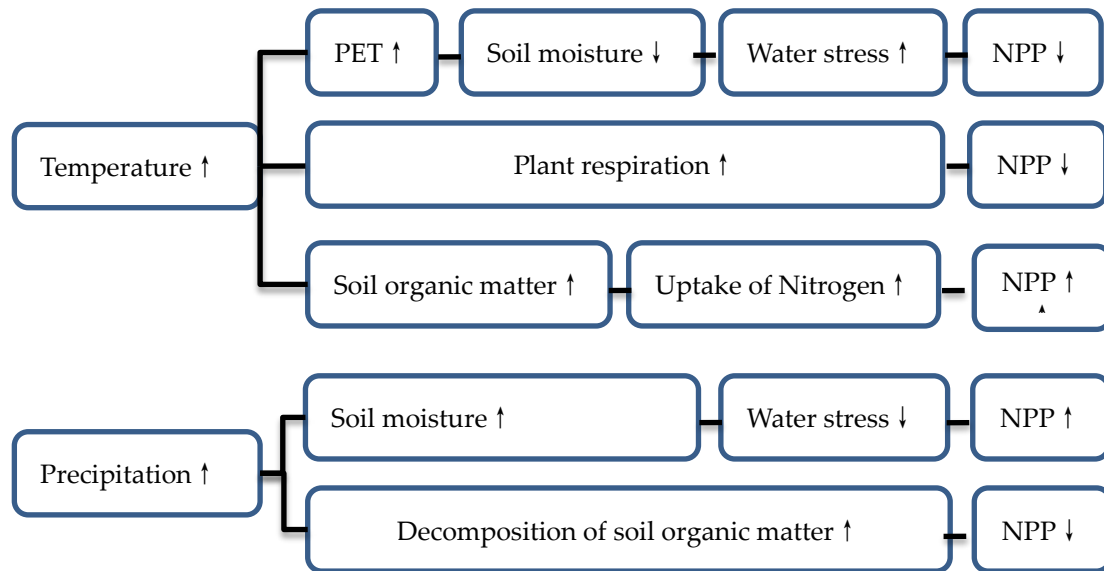

**Figure S2.** The influence of climate change to NPP

Notes: PET: Potential Evapotranspiration
