# Supplementary material
Source: MDPI journal article supplement (https://www.mdpi.com/2072-4292/10/6/860)
Supplement: s1 [file s1]

# Supplementary Materials

## 2 Figure, 5 Tables and Abbreviations

**Figure S1:** Distribution of Chinese vegetation from the 1960s to 2000s

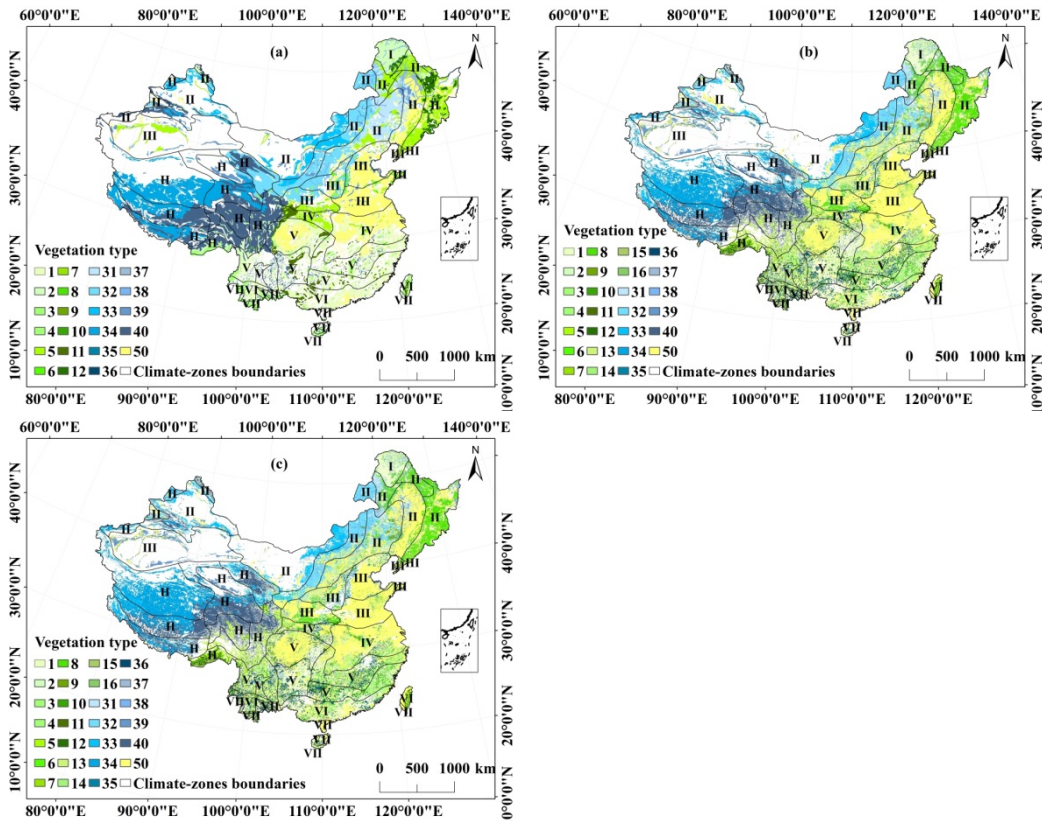

**Figure S1:** Distribution of Chinese vegetation from the 1960s to 2000s: (a) Vegetation type in the 1960s; (b) Vegetation type in the 1980s; (c) Vegetation type in the 2000s

26 **Figure S2:** The influence of climate change to NPP

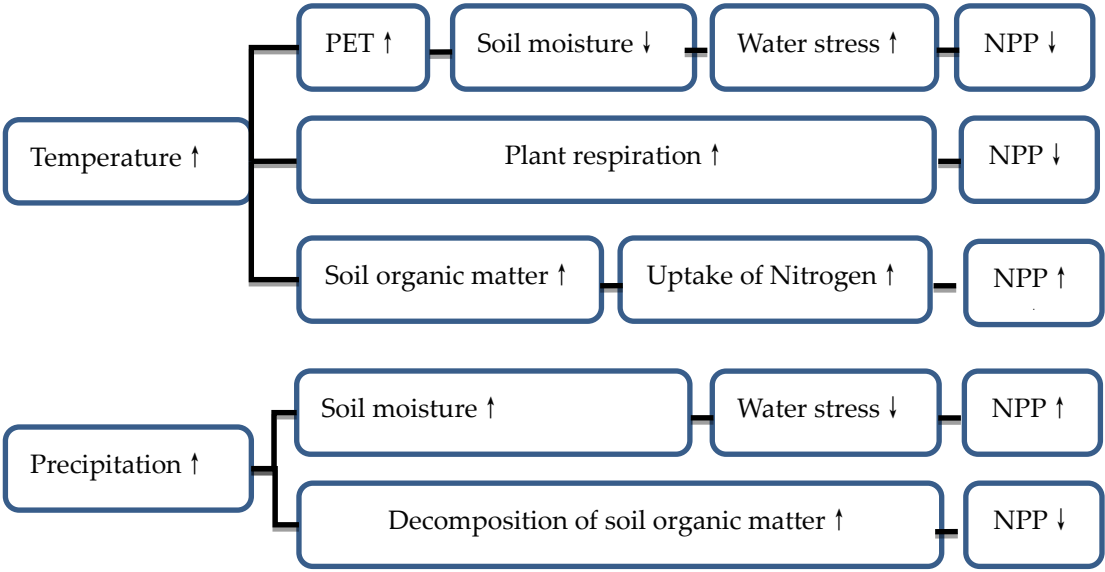

27  
28

29 **Figure S2.** The influence of climate change to NPP

30 Notes: PET: Potential Evapotranspiration

31  
32  
33  
34  
35  
36  
37  
38  
39  
40  
41  
42  
43  
44  
45  
46  
47  
48  
49  
50  
51  
52  
53  
54  
55  
56

**Table S1:** Chinese vegetation classification

**Table S2:** The summarized coefficients for estimation of farmland NPP

**Table S3:** The summarized coefficients for estimation of grassland NPP

**Table S4:** The summarized coefficients for estimation of forest NPP

**Table S5:** The abbreviations of Chinese provinces

**Table S1.** Chinese vegetation classification

| ID | Vegetation type                                                                                     | Vegetation type Group                  | area (km <sup>2</sup> ) |
|----|-----------------------------------------------------------------------------------------------------|----------------------------------------|-------------------------|
| 1  | <i>Needleleaf forests in cold-temperate zone and on mountains in temperate zone</i>                 | Needleleaf Forests                     | 160185.94               |
| 2  | <i>Needleleaf forests in temperate zone</i>                                                         | Needleleaf Forests                     | 40196.18                |
| 3  | <i>Needleleaf forests in subtropical zone</i>                                                       | Needleleaf Forests                     | 466128.55               |
| 4  | <i>Needleleaf forests in tropical zone</i>                                                          | Needleleaf Forests                     | 65.14                   |
| 5  | <i>Needleleaf forests on mountains in subtropical and tropical zones</i>                            | Needleleaf Forests                     | 149388.13               |
| 6  | <i>Needleleaf and deciduous broadleaf mixed forests in temperate zone</i>                           | Needleleaf and Broadleaf Mixed Forests | 17361.88                |
| 7  | <i>Needleleaf, evergreen and deciduous broadleaf mixed forests on mountains in subtropical zone</i> | Needleleaf and Broadleaf Mixed Forests | 4299.07                 |
| 8  | <i>Broadleaf deciduous forests in temperate zone</i>                                                | Broadleaf Forests                      | 401102.19               |
| 9  | <i>Microphyllous deciduous woodlands in temperate zone</i>                                          | Broadleaf Forests                      | 31366.41                |
| 10 | <i>Broadleaf deciduous forests in subtropical zone</i>                                              | Broadleaf Forests                      | 37579.04                |
| 11 | <i>Broadleaf evergreen and deciduous mixed forests in subtropical zone</i>                          | Broadleaf Forests                      | 19285.72                |
| 12 | <i>Broadleaf evergreen forests in subtropical zone</i>                                              | Broadleaf Forests                      | 126565.82               |
| 13 | <i>Sclerophyllous broadleaf evergreen forests in subtropical zone</i>                               | Broadleaf Forests                      | 15712.2                 |
| 14 | <i>Tropical monsoon forests</i>                                                                     | Broadleaf Forests                      | 6165.31                 |
| 15 | <i>Tropical rain forests</i>                                                                        | Broadleaf Forests                      | 19242.31                |
| 16 | <i>Bamboo forests and scrubs in subtropical and tropical zones</i>                                  | Broadleaf Forests                      | 34452.14                |
| 31 | <i>Temperate grass, forb meadow steppes</i>                                                         | Steppes                                | 93396.06                |
| 32 | <i>Temperate tufted grass steppes</i>                                                               | Steppes                                | 445778.58               |
| 33 | <i>Temperate tufted low grass, nano-semi-shrub desert steppes</i>                                   | Steppes                                | 227079.83               |
| 34 | <i>Grass, Carex spp. high-cold steppes</i>                                                          | Steppes                                | 635375.2                |
| 35 | <i>Temperate grasslands</i>                                                                         | Grasslands                             | 58140.86                |
| 36 | <i>Subtropical and tropical grasslands</i>                                                          | Grasslands                             | 243033.6                |
| 37 | <i>Grass and forb meadows</i>                                                                       | Meadows                                | 123859.63               |
| 38 | <i>Grass, Carex and forb swamp meadows</i>                                                          | Meadows                                | 62693.55                |
| 39 | <i>Grass and forb halophytic meadows</i>                                                            | Meadows                                | 161094.3                |
| 40 | <i>Kobresia spp., forb high-cold meadows</i>                                                        | Meadows                                | 683327.95               |
| 50 | <i>Farmland</i>                                                                                     | Farmland                               | 1999379.83              |

70

**Table S2.** The summarized coefficients for estimation of Farmland NPP

| Farmland type  | <i>HI</i> | <i>Mc</i> | <i>f<sub>AG</sub></i> |
|----------------|-----------|-----------|-----------------------|
| wheat          | 0.37      | 0.125     | 0.83                  |
| corn           | 0.49      | 0.135     | 0.85                  |
| paddy          | 0.4       | 0.1375    | 0.80                  |
| Beans          | 0.25      | 0.125     | 0.87                  |
| Potato         | 0.68      | 0.133     | 0.80                  |
| cotton         | 0.35      | 0.083     | 0.80                  |
| Oil            | 0.39      | 0.09      | 0.94                  |
| Sugar material | 0.39      | 0.133     | 0.80                  |

71

Note: *HI* is the crop harvest index (economic production and the ratio of plant dry weight above

72

ground.) [1-3], *Mc* is the water content of the crop harvest (%) [1-3], *f<sub>AG</sub>* refers to the fraction of the

73

aboveground biomass to the total biomass [1, 4-7]. Different crops had different parameters, which can

74

be seen in Table S2.

75

76

77

78

79

80

81

82

83

84

85

86

87

88

89

90

91

92

93

94

95

96

97

98

99

100

101

102

103

104

105

106

**Table S3.** The summarized coefficients for estimation of )Grassland NPP[8-11]

| <b>Grassland type</b>                                                 | <b>Sug</b> | <b>Sbn</b> | <b>R<sub>fd</sub></b> | <b>PWC</b> |
|-----------------------------------------------------------------------|------------|------------|-----------------------|------------|
| <i>Temperate grass,forb meadow steppes</i>                            | 5.26       | 0.45       | 3.2                   | 15%        |
| <i>Temperate tufted grass steppes</i>                                 | 4.25       | 0.45       | 3                     | 15%        |
| <i>Temperate tufted low grass,<br/>nano-semi-shrub desert steppes</i> | 7.89       | 0.45       | 2.7                   | 15%        |
| <i>Grass,Carex spp. high-cold steppes</i>                             | 7.91       | 0.45       | 3                     | 15%        |
| <i>Temperate grasslands</i>                                           | 4.42       | 0.45       | 3.2                   | 15%        |
| <i>Subtropical and tropical grasslands</i>                            | 4.42       | 0.45       | 3.2                   | 15%        |
| <i>Grass and forb meadows</i>                                         | 6.23       | 0.45       | 3.5                   | 15%        |
| <i>Grass,Carex and forb swamp meadows</i>                             | 15.68      | 0.45       | 5                     | 15%        |
| <i>Grass and forb halophytic meadows</i>                              | 6.31       | 0.45       | 3.5                   | 15%        |
| <i>Kobresia spp.,forb high-cold meadows</i>                           | 7.92       | 0.45       | 3.2                   | 15%        |

107

108

109

110

111

112

113

114

115

116

117

118

119

120

121

122

123

124

125

126

127

128

129

130

131

132

133

134

135

136

137

138

139

140

141

**Table S4.** The summarized coefficients for estimation of Forest NPP[3, 10] [12-14]

| Forest type                                                                                                        | a      | b      | c      | d      | e           | f      |
|--------------------------------------------------------------------------------------------------------------------|--------|--------|--------|--------|-------------|--------|
| <i>Kashiwagi</i>                                                                                                   | 1.0202 | 0.0022 | 0.1132 | 0.0745 | 9.8391      | 0.1337 |
| <i>Huashan pine forest</i>                                                                                         | 1.239  | 0.0013 | 0.384  | 0.0104 | 7.5272      | 0.1102 |
| <i>Birch forest</i>                                                                                                | 0.8115 | 0.0019 | 0.308  | 0.0138 | 16.722      | 0.0324 |
| <i>Broad-leaved mixed forest</i>                                                                                   | 0.5788 | 0.002  | 0.3018 | 0.0331 | 9.1028      | 0.0575 |
| <i>Alpine oak forest</i>                                                                                           | 0.7823 | 0.0014 | 0.2989 | 0.0117 | 34.845      | 0.0283 |
| <i>Larch forest</i>                                                                                                | 1.1111 | 0.0016 | 0.1885 | 0.0728 | 16.734      | 0.0577 |
| <i>Masson pine forest</i>                                                                                          | 1.4254 | 0.0004 | 0.4046 | 0.0098 | 15.451      | 0.0225 |
| <i>Other warm pine</i>                                                                                             | 1.3624 | 0.0003 | 0.2423 | 0.0581 | 18.905      | 0.0422 |
| <i>Tropical forest (Eucalyptus, Casuarina)</i>                                                                     | 0.6809 | 0.0006 | 0.1797 | 0.0344 | 8.0976      | 0.054  |
| <i>Chinese fir forest (cedar, Metasequoia)</i>                                                                     | 1.2917 | 0.0022 | 0.4598 | 0.0069 | 10.132      | 0.0874 |
| <i>Chinese fir forest (cedar, Metasequoia)</i>                                                                     | 1.2917 | 0.0022 | 0.4598 | 0.0069 | 8.7239      | 0.0418 |
| <i>Pinus tabulaeformis (Pinus sylvestris, black pine, arborvitae)</i>                                              | 1.0529 | 0.002  | 0.352  | 0.0161 | 11.177      | 0.1501 |
| <i>Spruce Forest</i>                                                                                               | 1.3667 | 0.0012 | 0.2267 | 0.0526 | 27.204      | 0.0812 |
| <i>Spruce Forest (only in Xinan China)</i>                                                                         | 1.3667 | 0.0012 | 0.2267 | 0.0526 | 3.34±0.9277 |        |
| <i>Pinus sylvestris</i>                                                                                            | 1.2544 | 0.003  | 0.1405 | 0.1203 | 4.2±0.3538  |        |
| <i>Mixed coniferous and broad-leaved forest (Korean pine)</i>                                                      | 1.1731 | 0.0018 | 0.1038 | 0.0761 | 3.46±0.9597 |        |
| <i>Evergreen broad-leaved forest</i>                                                                               | 0.7883 | 0.0026 | 0.2503 | 0.0226 | 20.507      | 0.0383 |
| <i>Deciduous broad-leaved forests (oaks, hardwoods, lime trees, miscellaneous trees and water hyacinths, etc.)</i> | 0.6539 | 0.0038 | 0.2393 | 0.0495 | 18.246      | 0.0366 |

142

143

144

145

146

147

148

149

150

151

152

153

154

155

156

157

158

159

160

161

162

**Table S5.** The abbreviations of Chinese provinces

| Name abbreviation | Name         |
|-------------------|--------------|
| BJ                | Beijing      |
| FJ                | Fujian       |
| GS                | Gansu        |
| GD                | Guangdong    |
| GX                | Guangxi      |
| GZ                | Guizhou      |
| HAN               | Hainan       |
| HEB               | Hebei        |
| HEN               | Henan        |
| HLJ               | Heilongjiang |
| HUB               | Hubei        |
| HUN               | Hunan        |
| JL                | Jilin        |
| JS                | Jiangsu      |
| JX                | Jiangxi      |
| LN                | Liaoning     |
| NMG               | Neimeng      |
| NX                | Ningxia      |
| SD                | Shandong     |
| SX                | Shanxi       |
| SAX               | Shannxi      |
| SH                | Shanghai     |
| SC                | Sichuan      |
| TJ                | Tianjin      |
| XJ                | Xinjiang     |
| YN                | Yunnan       |
| ZJ                | Zhejiang     |
| CQ                | Chongqing    |

163  
164  
165  
166  
167  
168  
169  
170  
171  
172  
173  
174  
175  
176  
177  
178

## Abbreviations

NPP: net primary productivity; AGB: aboveground biomass; BGB: belowground biomass; AVHRR: Advanced Very High Resolution Radiometer; MODIS: Moderate Resolution Imaging Spectroradiometer; CASA: Carnegie-Ames-Stanford-Approach; GLO-PEM: Global Production Efficiency Model; EC-LUE: Eddy Covariance-Light Use Efficiency; SPOT: Satellite Pour l'Observation de la Terre; BEF: biomass expansion factors; GPPDI: Global Primary Production Data Initiative; HHH: Huang-Huai-Hai; YR: Yangtze River Middle Plains; SCB: Sichuan Basin; IBIS: Integrated Biosphere Simulator; NDVI: Normalized Difference Vegetation Index; AVIM2: Atmosphere-Vegetation Interaction Model; BEPS: Boreal Ecosystem Productivity Simulator; BIOME-BGC: BIOME BioGeochemical Cycles; CEVSA: Carbon Exchange between Vegetation, Soil and Atmosphere model; TEM: Terrestrial Ecosystem Model.

1. Lobell, D. B.; Hicke, J. A.; Asner, G. P.; Field, C. B.; Tucker, C. J.; Los, S. O., Satellite estimates of productivity and light use efficiency in United States agriculture, 1982-98. *Glob. Change Biol.* **2002**, 8, (8), 722-735.
2. Yan, H. M.; Cao, M. K., Spatial Pattern and Topographic Control of China's Agricultural Productivity Variability(in chinese). *Acta Geographica Sinica* **2007**, 62, (2), 171-180.
3. Fang, J. Y.; Liu, G. H.; Xu, S. L.; Wang, G. C.; Wen, Y. P., *Carbon reservoir of terrestrial ecosystem in China(in chinese)*. Chinese environment sciences Press: Beijing, 1996.
4. Hay, R. K. M., Harvest Index - a Review of Its Use in Plant-Breeding and Crop Physiology. *Ann. Appl. Biol.* **1995**, 126, (1), 197-216.
5. Guo, Z. X.; Wang, Z. M.; Liu, D. W.; Song, K. S.; Song, C. C.; Song, C., Analysis of temporal and spatial features of farmland productivity in the Sanjiang plain. *Transactions of the Chinese Society of Agricultural Engineering* **2009**, (01), 249-254.
6. Steingrobe, B.; Schmid, H.; Gutser, R.; Claassen, N., Root production and root mortality of winter wheat grown on sandy and loamy soils in different farming systems. *Biol. Fertil. Soils* **2001**, 33, (4), 331-339.
7. Hicke, J. A.; Lobell, D. B.; Asner, G. P., Cropland Area and Net Primary Production Computed from 30 Years of USDA Agricultural Harvest Data. *Earth Interact* **2004**, 8.
8. Commission for Integrated Survey of Natural Resources of the Chinese Academy of Science, Data on grassland resources of China(in chinese). In China Agriculture Science and Technology Press: Beijing, 1994.



- 223 9. Piao, S. L.; Fang, J. Y.; He, J. S.; Xiao, Y., Spatial distribution of grassland biomass in  
224 China(in chinese). *Chinese Journal of Plant Ecology* **2004**, 28, (4), 491-498.
- 225 10. Fang, J. Y.; Xu, S. L., Biomass and net production of forest vegetation in China(in  
226 chinese). *Acta Ecologica Sinica* **1996**, 16, (5), 497-508.
- 227 11. Liao, G. F., *General situation of natural grassland resources in the western and northern*  
228 *parts of China(in chinese)*. Science press: Beijing, 1964.
- 229 12. Zhao, M.; Zhou, G. S., Estimation of biomass and net primary productivity of major  
230 planted forests in China based on forest inventory data. *For. Ecol. Manage.* **2005**, 207,  
231 (3), 295-313.
- 232 13. Wang, Y. H.; Zhou, G. S.; Jiang, Y. L.; Yang, Z. Y., Estimating biomass and npp of larix  
233 forests using forest inventory data (in chinese). *Acta Phytoecologica Sinica* **2001**, 25, (4),  
234 420-425.
- 235 14. Wang, B.; Liu, M. C.; Zhang, B., Dynamics of Net Production of Chinese Forest  
236 Vegetation Based on Forest Inventory Data. *Forest Resources Management* **2009**, 1, (3),  
237 35-43.  
238
